# Supplementary material for: Myeloid PTEN loss affects the therapeutic response by promoting stress granule assembly and impairing phagocytosis by macrophages in breast cancer
Source: PubMed Central journal article supplement (PMC11289284; doi:10.1038/s41420-024-02094-0), 2024-07-30

# Cell Line Authentication Service

---

## STR Profiling Report

**Sample From:** Division of Life Sciences and Medicine,  
University of Science and Technology of  
China, Hefei, Anhui

**Sample Type:** Cell Line

**Testing Method:** STR Genotyping

**Report Time:** May 19, 2024

## COMPANY STATEMENT

1. THIS REPORT IS ONLY RESPONSIBLE FOR THE SAMPLES ANALYZED.
2. THE TESTING RESULTS AND THE ORGANIZATION NAME WILL NOT BE USED FOR ADVERTISEMENT, COMMERCIAL EXHIBITIONS, COMMERCIAL PERFORMANCE AND OTHER COMMERCIAL ACTIVITIES.
3. OBJECTIONS SHOULD BE RAISED WITHIN FIFTEEN DAYS AFTER THE RECEIPT OF THIS REPORT.
4. THE PAPER REPORT WITH CONTENT ALTERING, ADDING OR WITHOUT THE STAMPED SEAL OF THE COMPANY ARE INVALID.

**Testing Company:** Shanghai Biowing Applied Biotechnology Co. Ltd

**Address:** Room 502, NO.1015 Longteng Rd, Songjiang District, Shanghai

**Tel:** +86-18521538068

**Contact:** Shuangning Zhu

**E-mail:** zhusn@biowing.com.cn

## Cell Line Authentication – STR Profiling Report

### Sample code

Table 1. Sample Code

| Customer's code | Company Code |
|-----------------|--------------|
| 4T1             | 20240517-01  |

**Sample Number:** 1

**Sample Type:** Cell line

**Testing Type:** STR

**Testing Method:**

DNA was extracted by a commercial kit from CORNING (AP-EMN-BL-GDNA-250G). The ten STRs including one human locus were amplified by multiplex PCR and separated on ABI 3730XL Genetic Analyzer. The signals were then analyzed by the software GeneMapper..

### Data Interpretation:

Cell lines were authenticated using Short Tandem Repeat (STR) analysis as described in 2021 in ANSI Standard (ASN-0002) by the ATCC Standards Development Organization (SDO) and in Capes-Davis et al., Match criteria for human cell line authentication: Where do we draw the line? Int J Cancer.2013;132(11):2510-9. DSMZ tools was used to carry on the cell line comparison, which contains 2455 cell lines STR data from ATCC, DSMZ, JCRB, ECACC, GNE, RIKEN and EXPASY databases. If the cell is not included in the above cell library, users need to compared with other databases.

# Test Results

## 1. STR profile

Table 2. STR and Amelogenin Genotyping Results of Cell line.

| Loci    | Sample information |         |         |         | Cell Bank information |         |         |
|---------|--------------------|---------|---------|---------|-----------------------|---------|---------|
|         | Sample name: 4T1   |         |         |         | Cell line name: 4T1   |         |         |
|         | Allele1            | Allele2 | Allele3 | Allele4 | Allele1               | Allele2 | Allele3 |
| 18-3    | 19                 |         |         |         | 19                    |         |         |
| 4-2     | 21.3               |         |         |         | 21.3                  |         |         |
| 6-7     | 12                 |         |         |         | 12                    |         |         |
| 19-2    | 13                 |         |         |         | 13                    |         |         |
| 1-2     | 17                 |         |         |         | 17                    |         |         |
| 7-1     | 25.2               |         |         |         | 25.2                  |         |         |
| 8-1     | 13                 |         |         |         | 13                    |         |         |
| 1-1     | 15                 | 16      |         |         | 15                    | 16      |         |
| 3-2     | 14                 | 15      |         |         | 14                    | 15      |         |
| 2-1     | 16                 | 17      |         |         | 16                    | 17      |         |
| 15-3    | 22.3               |         |         |         | 22.3                  |         |         |
| 6-4     | 18                 |         |         |         | 18                    |         |         |
| 13-1    | 16.2               |         |         |         | 16.2                  |         |         |
| 11-2    | 18                 | 19      | 20      |         | 18                    | 19      | 20      |
| 17-2    | 15                 |         |         |         | 15                    |         |         |
| 12-1    | 16                 |         |         |         | 16                    |         |         |
| 5-5     | 14                 |         |         |         | 14                    |         |         |
| X-1     | 25                 |         |         |         | 25                    |         |         |
| TH01    |                    |         |         |         |                       |         |         |
| D4S2408 |                    |         |         |         |                       |         |         |

## 2. database annotation

Figure 1. STR matching analysis

| Accession | Name  | N° Markers | Score   | STR 1-1 | STR 1-2 | STR 2-1 | STR 3-2 | STR 4-2 | STR 5-5 | STR 6-4 | STR 6-7 | STR 7-1 | STR 8-1 | STR 11-2 | STR 12-1 | STR 13-1 | STR 15-3 | STR 17-2 | STR 18-3 | STR 19-2 | STR X-1 |
|-----------|-------|------------|---------|---------|---------|---------|---------|---------|---------|---------|---------|---------|---------|----------|----------|----------|----------|----------|----------|----------|---------|
| NA        | Query | NA         | NA      | 15,16   | 17      | 16,17   | 14,15   | 21,3    | 14      | 18      | 12      | 25,2    | 13      | 18,19,20 | 16       | 16,2     | 22,3     | 15       | 18,19    | 13       | 25      |
| CVCL_0125 | 4T1   | 18         | 100.00% | 15,16   | 17      | 16,17   | 14,15   | 21,3    | 14      | 18      | 12      | 25,2    | 13      | 18,19,20 | 16       | 16,2     | 22,3     | 15       | 18,19    | 13       | 25      |

**Note:** The STR online match analysis of the test cell against EXPASY database, showing cell number (Cell No.) and cell name.

## 3. Authentication

- The submitted sample profile is mouse, but not a match for any profile in the DSMZ.
- The submitted profile is an exact match for the following human cell line(s) in the DSMZ STR database (8 core loci plus Amelogenin): **4T1**.

The submitted profile is similar to the following DSMZ human cell line: /.

- Note:** A cell line can be considered to be authenticated when 80% (exact match) of the alleles in its STR profile match profiles from tissue or other cell line samples from that donor or from database. Cell lines with between a 55% to 80% (similar) match require further profiling for investigation of relatedness.

# Appendix:

## 1. Genotyping Strategy and Site Distribution

Table S1. Experimental Strategy and Sites

|   | 方案 1 | 方案 2 | 方案 3 | 方案 4   |
|---|------|------|------|--------|
| 1 | 18-3 | 1-2  | 2-1  | TH01   |
| 2 | 4-2  | 7-1  | 15-3 | D5S818 |
| 3 | 6-7  | 8-1  | 6-4  | 17-2   |
| 4 | 19-2 | 1-1  | 13-1 | 12-1   |
| 5 |      | 3-2  | 11-2 | 5-5    |
| 6 |      |      |      | X-1    |

The allele match algorithm compares the 18 core loci only, D5S818, TH01 is a human site, which is used to detect whether the cell is contaminated by human sources.

**Technician:** Jianan Zhang

**Checked by:** Chenqian Zhang

**Issued by:** Yang Bai

**Issue date:** May 19, 2024

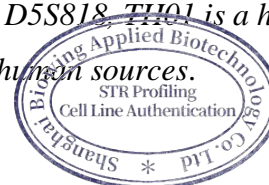

Figure 2. STR profiles of sample cell line

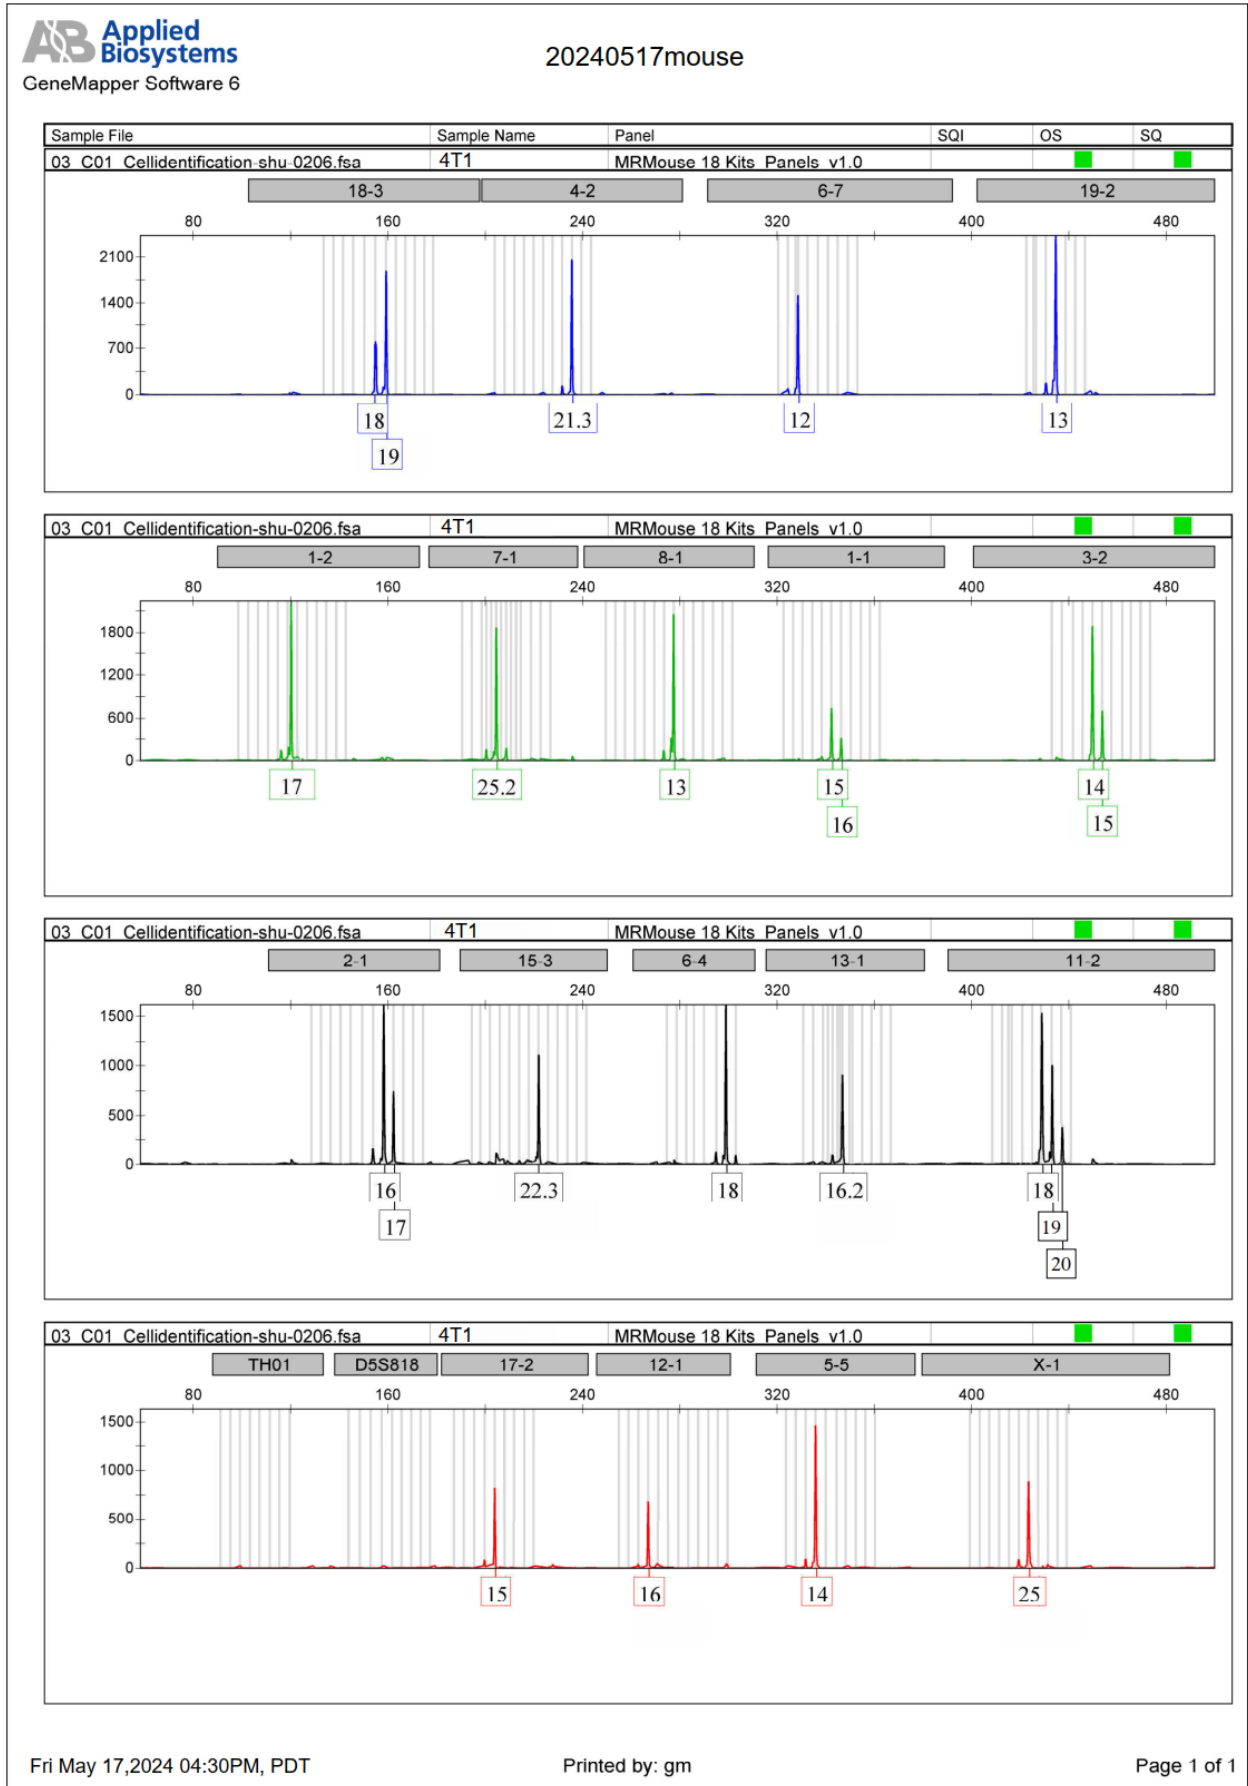

Supplement: 41420_2024_2094_MOESM1_ESM.pdf [file 41420_2024_2094_MOESM1_ESM.pdf]
