# Supplementary material for: Myeloid PTEN loss affects the therapeutic response by promoting stress granule assembly and impairing phagocytosis by macrophages in breast cancer
Source: PubMed Central journal article supplement (PMC11289284; doi:10.1038/s41420-024-02094-0), 2024-07-30

**Supplementary Figure 1**

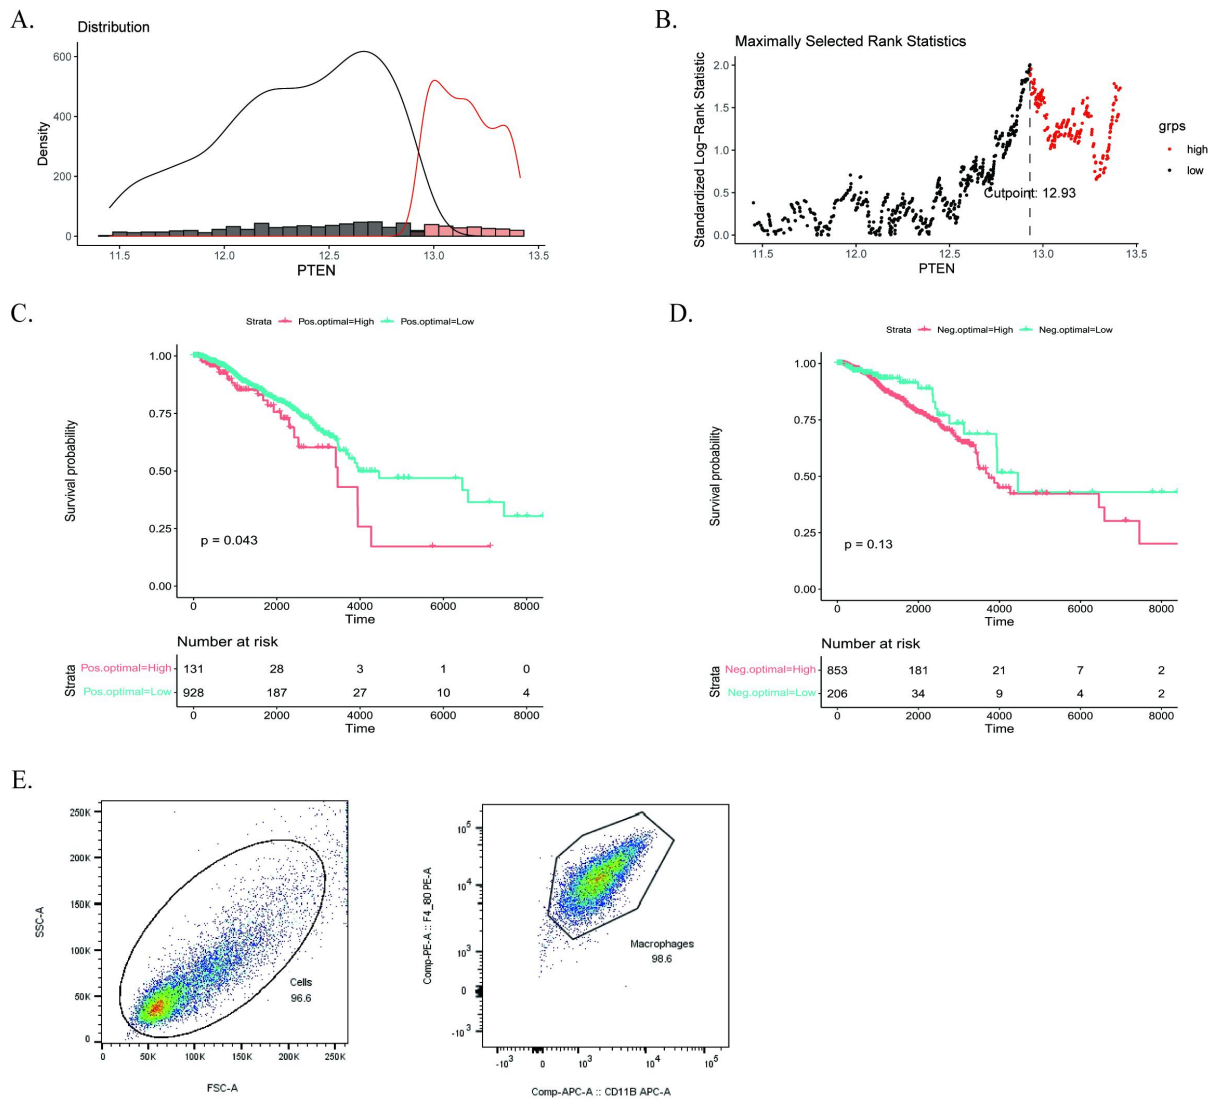

**Supplementary Figure 1. Survival analysis of PTEN and oxidative stress regulatory factors in breast cancer patients.**

**(A)&(B)** Optimal cutoff calculating BRCA patients data including total survival and PTEN expression were collected from TCGA-BRCA database, and optimal cutoff was calculated by R language survey package. The cutpoint was 12.93. **(C)** Overall survival analysis of BRCA patients with different level of oxidative stress response regulation. BRCA patients data from TCGA-BRCA database was collected and performed enrichment analyses with "positive\_regulation\_of\_response\_to\_oxidative\_stress"(GO:1902884) from the GSEA database. Kaplan-Meier survival analysis was performed on the classified groups: positive\_regulation\_high and positive\_regulation\_low. **(D)** Kaplan-Meier survival analysis was performed on the classified groups: negative\_regulation\_high and negative\_regulation\_low. ((GO:1902883)) Same as (C). **(E)** Authentication of BMDMs (BMC on d7) using flow cytometry.

## Supplementary Figure 2

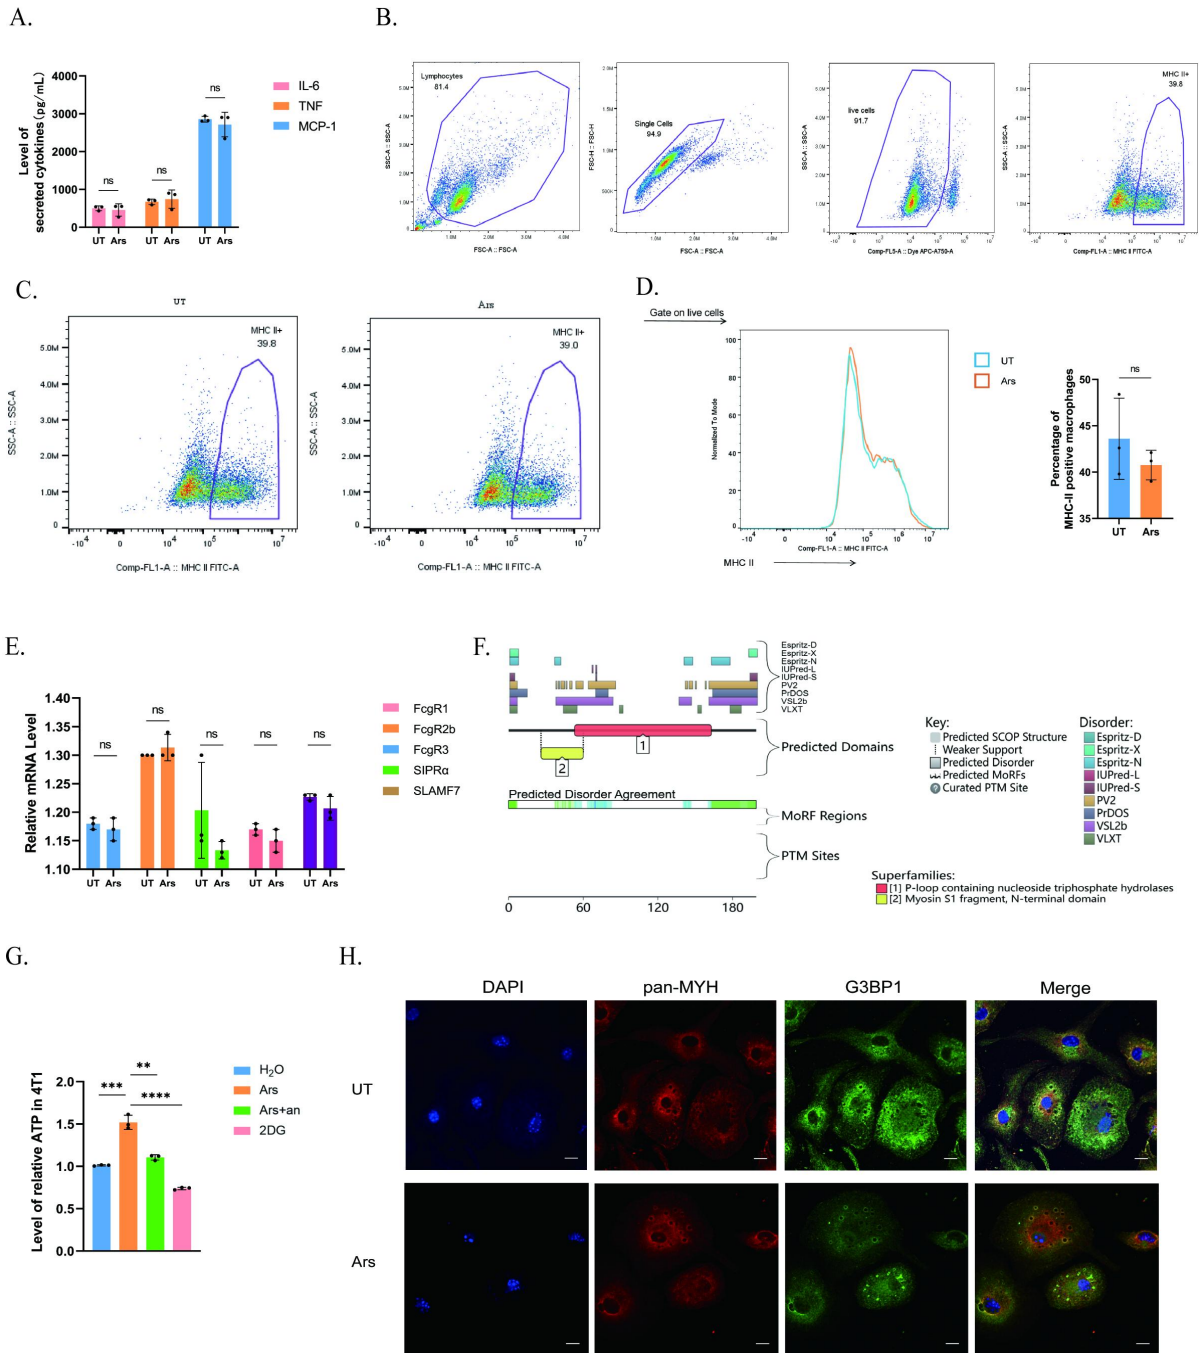

**Fig. 2 Mechanisms of SGs impairing anti-tumor immunity of PTEN deficient BMDMs.** LPS (100 ng/mL) was treated to the two groups of BMDM for 4 hours for activation, and the UT group was the untreated control group. The Ars group was induced by sodium arsenite at 90  $\mu$ M for 1 hour. **(A)** The levels of IL-6, TNF, and MCP-1 in the cell supernatant were detected using the CBA method simultaneously. The statistical method was mean  $\pm$  standard deviation; n = 3 independent experiments, double-tailed student T-test, and ns had no statistical significance. **(B)** Gating strategies sorting MHC-II positive cells. **(C and D)** The FITC-MHC-II antibody was used to mark each group of BMDM, and the percentage of positive cells in each group was calculated. **(E)** Relative mRNA level of several canonical phagocyte-related receptors on macrophages. Cells were harvested with or without SGs induction. **(F)** The IDRs prediction of MYH9 by the D2P2 database ([Database of Disordered Protein Predictions](#)). The target region were showed in red frame and highlighted in bright green. **(G)** Intracellular ATP level in 4T1 cells. 2DG was given at 5 mM for 1 hour. means  $\pm$  SDs; n = 10 holes of 3 independent experiments, p value was determined by two-tailed unpaired Student's t test with multiple comparisons test. **(H)** Fluorescence staining of cytoskeleton and stress granules. Actin-Tracker Green (green) was used to label myosin filaments F-actin, and Alexa Fluor&#174;594 (red) was used to label G3BP1 as a representative of core proteins of stress granules. The dotted accumulation of G3BP1 represented the formed stress granules. The arrow indicated the cells forming stress granules. The scale bar was 10  $\mu$ m.

Supplementary Table 1

Miller-Payne (MP) scoring system

| <b>Grade(score)</b> | <b>Description</b>                                                                                                                                                                                 |
|---------------------|----------------------------------------------------------------------------------------------------------------------------------------------------------------------------------------------------|
| 1                   | no change or some alteration to individual malignant cells but no reduction in overall cellularity                                                                                                 |
| 2                   | a minor loss of tumour cells but overall cellularity still high; up to 30% loss                                                                                                                    |
| 3                   | an estimated 30% - 90% reduction in tumour cells                                                                                                                                                   |
| 4                   | a marked disappearance of tumour cells such that only small clusters or widely dispersed individual cells remain; more than 90% loss of tumour cells                                               |
| 5                   | no malignant cells identifiable in sections from the site of the tumour; only vascular fibroelastotic stroma remains often containing macrophages. Ductal carcinoma in situ (DCIS) may be present. |

Supplementary Table 6

## Primers for PCR and qPCR

| Gene          | Direction | Sequence (5'-3')        |
|---------------|-----------|-------------------------|
| Actin         | forward   | GGCTGTATTCCCCTCCATCG    |
|               | reverse   | CCAGTTGGTAACAATGCCATGT  |
| PTEN          | forward   | TGGATTCGACTTAGACTTGACCT |
|               | reverse   | GCGGTGTCATAATGTCTCTCAG  |
| FcγR I        | forward   | AGGTTCCCTCAATGCCAAGTGA  |
|               | reverse   | GCGACCTCCGAATCTGAAGA    |
| FcγR IIb      | forward   | ATGGGAATCCTGCCGTTCTTA   |
|               | reverse   | CCGTGAGAACACATGGACAGT   |
| FcγR III      | forward   | CAGAATGCACACTCTGGAAGC   |
|               | reverse   | GGGTCCCTTCGCACATCAG     |
| FcγR IV       | forward   | ATGTGGCAGCTACTACTACCA   |
|               | reverse   | ACCCACTTGGGGTCTAGGTTC   |
| SIRP $\alpha$ | forward   | AGTCACGGGGAAAGAACTGAA   |
|               | reverse   | CGGCTTTGCCTACTCCTCTG    |
| SLAMF7        | forward   | AGAACGCAGACTATGACACAATC |
|               | reverse   | AGGGAGCTGGGACTCTTTACC   |
| PTEN loxp     | forward   | CTCCTCTACTCCATTCTTCCC   |
|               | reverse   | ACTCCCACCAATGAACAAAC    |
|               | Common    | CTTGGGCTGCCAGAATTTCTC   |
| Lyz2 cre      | Wt        | TTACAGTCGGCCAGGCTGAC    |
|               | Mut       | CCCAGAAATGCCAGATTACG    |
| TIAL1-primerA | forward   | ACACATAATCCCAGCACTAGG   |
|               | reverse   | ACACATAATCCCAGCACTAGG   |
| TIAL1-primerB | forward   | GGCAGGATCCTACTTCAAGTTC  |
|               | reverse   | TGAAGATTGATCACGTTGGGG   |
| TIAL1-primerC | forward   | TGGCACATACACATAATCCCA   |
|               | reverse   | CAGCATGCAAGGGATGGA      |

Original file of Western Blot

Fig.2D

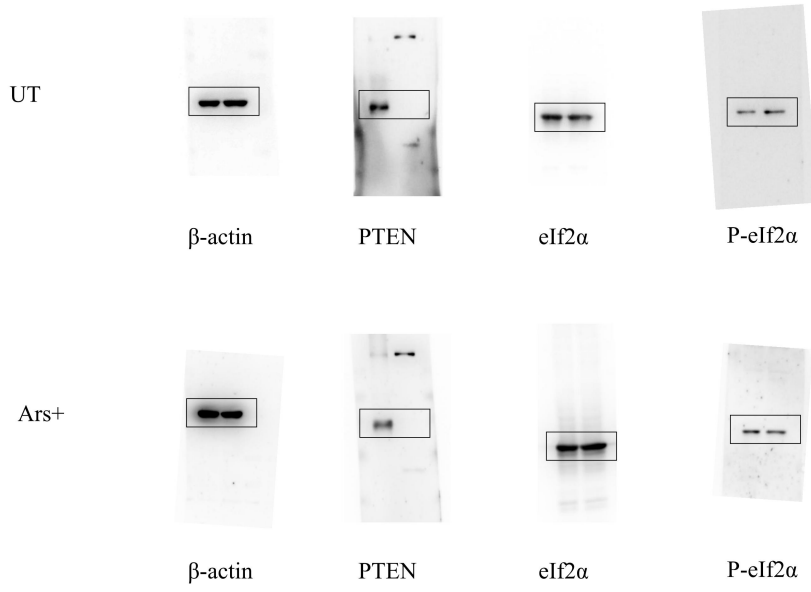

Fig.2E

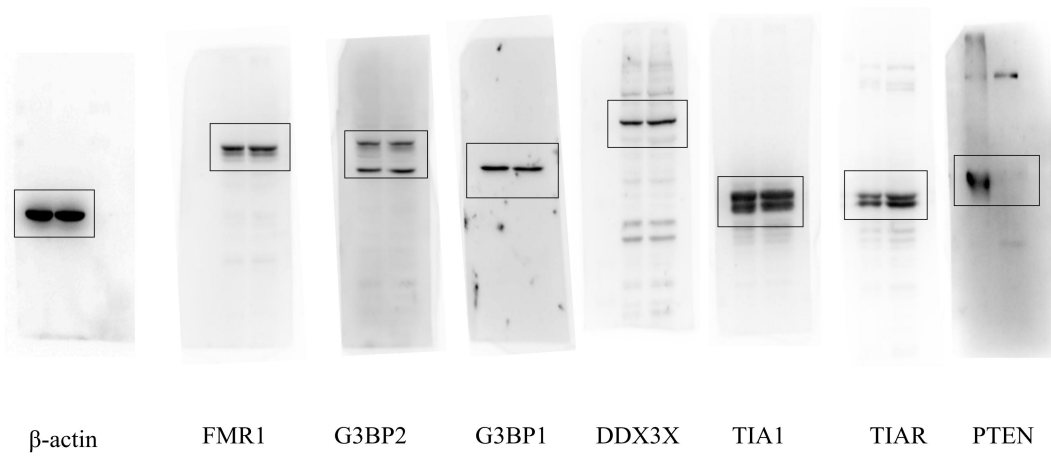

Fig.3E

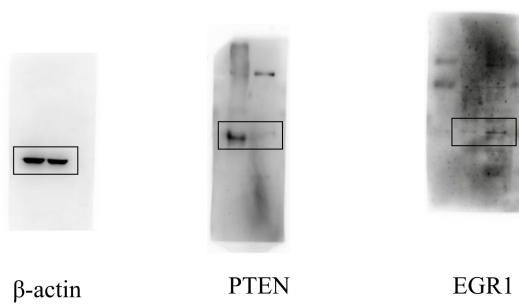

Supplement: 41420_2024_2094_MOESM2_ESM.pdf [file 41420_2024_2094_MOESM2_ESM.pdf]
